# Supplementary figures and images for: Wound-Healing Effects of an Exosome-Rich Conditioned Medium from Human Amniotic Membrane Stem Cells
Source: Preprints.org preprint supplement (doi:10.20944/preprints202308.0124.v1), 2023-08-02

Collagen-1

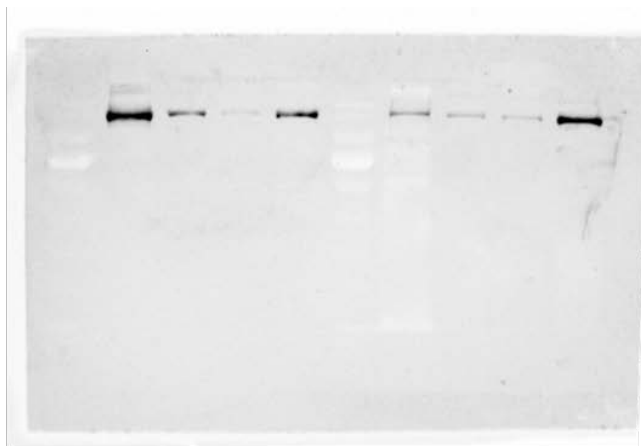

Collagen-3

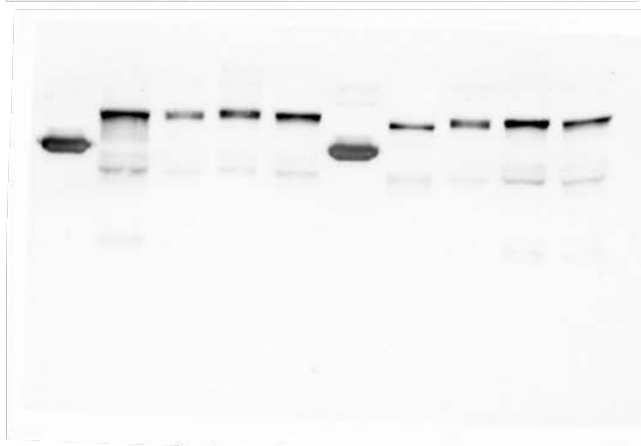

$\beta$ -Actin

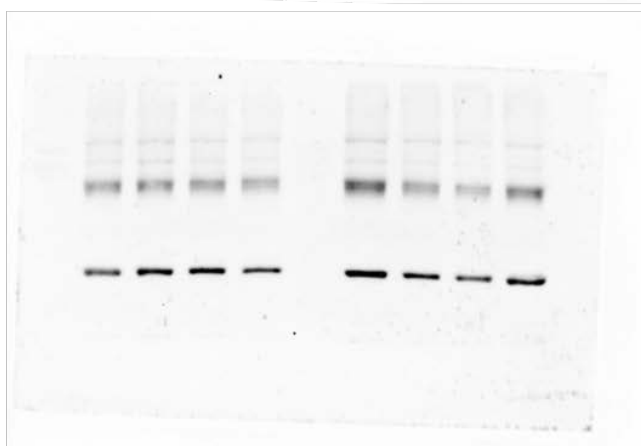

Supplementary Figure S1. Western blot analysis of collagens.

Supplement: Supplementary file 1 [file supplementary]
